# Supplementary material for: Construction of a novel cancer-associated fibroblast-related signature to predict clinical outcome and immune response in colon adenocarcinoma
Source: publisher site journal article supplement (doi:10.18632/aging.205032), 2023-09-16
Supplement: Supplementary file [file aging-v15i18-205032-supplementary-material-SD1.pdf]

**SUPPLEMENTARY FIGURES**

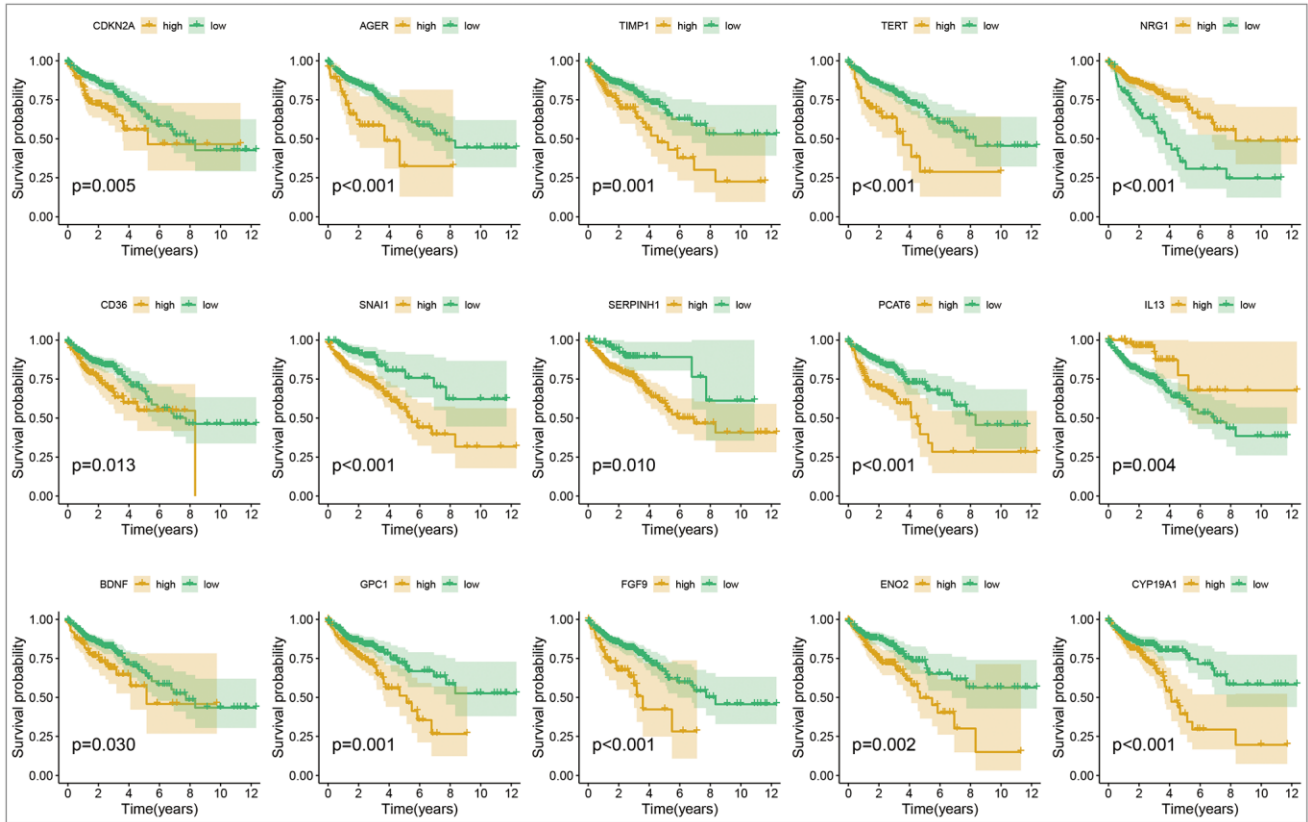

**Supplementary Figure 1. K-M curves of signature-related genes in the TCGA-COAD cohort.**

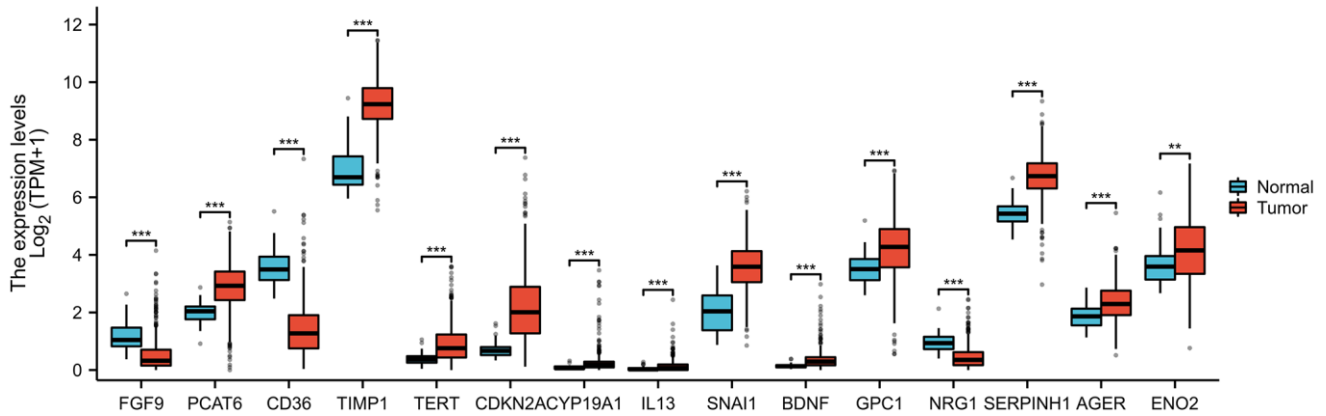

**Supplementary Figure 2. The differential expression status of CAFs-related genes in COAD tumor tissues and normal tissues in TCGA-COAD cohort.**
