# Supplementary material for: Construction of a novel cancer-associated fibroblast-related signature to predict clinical outcome and immune response in colon adenocarcinoma
Source: publisher site journal article supplement (doi:10.18632/aging.205032), 2023-09-16
Supplement: Supplementary file [file aging-v15i18-205032-supplementary-material-SD2.pdf]

## SUPPLEMENTARY TABLES

**Supplementary Table 1. Specific links to all immunohistochemistry images from the Human Protein Atlas.**

| Protein  | Specific link                                                                                                                                                                                    |
|----------|--------------------------------------------------------------------------------------------------------------------------------------------------------------------------------------------------|
| FGF9     | Normal: <a href="https://www.proteinatlas.org/ENSG00000102678-FGF9/tissue/colon">https://www.proteinatlas.org/ENSG00000102678-FGF9/tissue/colon</a>                                              |
|          | Tumor: <a href="https://www.proteinatlas.org/ENSG00000102678-FGF9/pathology/colorectal+cancer#ihc">https://www.proteinatlas.org/ENSG00000102678-FGF9/pathology/colorectal+cancer#ihc</a>         |
| CD36     | Normal: <a href="https://www.proteinatlas.org/ENSG00000135218-CD36/tissue/colon">https://www.proteinatlas.org/ENSG00000135218-CD36/tissue/colon</a>                                              |
|          | Tumor: <a href="https://www.proteinatlas.org/ENSG00000135218-CD36/pathology/colorectal+cancer#img">https://www.proteinatlas.org/ENSG00000135218-CD36/pathology/colorectal+cancer#img</a>         |
| TIMP1    | Normal: <a href="https://www.proteinatlas.org/ENSG00000102265-TIMP1/tissue/colon">https://www.proteinatlas.org/ENSG00000102265-TIMP1/tissue/colon</a>                                            |
|          | Tumor: <a href="https://www.proteinatlas.org/ENSG00000102265-TIMP1/pathology/colorectal+cancer#img">https://www.proteinatlas.org/ENSG00000102265-TIMP1/pathology/colorectal+cancer#img</a>       |
| TERT     | Normal: <a href="https://www.proteinatlas.org/ENSG00000164362-TERT/tissue/colon#img">https://www.proteinatlas.org/ENSG00000164362-TERT/tissue/colon#img</a>                                      |
|          | Tumor: <a href="https://www.proteinatlas.org/ENSG00000164362-TERT/pathology/colorectal+cancer#img">https://www.proteinatlas.org/ENSG00000164362-TERT/pathology/colorectal+cancer#img</a>         |
| CDKN2A   | Normal: <a href="https://www.proteinatlas.org/ENSG00000147889-CDKN2A/tissue/colon#img">https://www.proteinatlas.org/ENSG00000147889-CDKN2A/tissue/colon#img</a>                                  |
|          | Tumor: <a href="https://www.proteinatlas.org/ENSG00000147889-CDKN2A/pathology/colorectal+cancer#img">https://www.proteinatlas.org/ENSG00000147889-CDKN2A/pathology/colorectal+cancer#img</a>     |
| CYP19A1  | Normal: <a href="https://www.proteinatlas.org/ENSG00000137869-CYP19A1/tissue/colon#img">https://www.proteinatlas.org/ENSG00000137869-CYP19A1/tissue/colon#img</a>                                |
|          | Tumor: <a href="https://www.proteinatlas.org/ENSG00000137869-CYP19A1/pathology/colorectal+cancer#img">https://www.proteinatlas.org/ENSG00000137869-CYP19A1/pathology/colorectal+cancer#img</a>   |
| SNAI1    | Normal: <a href="https://www.proteinatlas.org/ENSG00000124216-SNAI1/tissue/colon#img">https://www.proteinatlas.org/ENSG00000124216-SNAI1/tissue/colon#img</a>                                    |
|          | Tumor: <a href="https://www.proteinatlas.org/ENSG00000124216-SNAI1/pathology/colorectal+cancer#img">https://www.proteinatlas.org/ENSG00000124216-SNAI1/pathology/colorectal+cancer#img</a>       |
| BDNF     | Normal: <a href="https://www.proteinatlas.org/ENSG00000176697-BDNF/tissue/colon#img">https://www.proteinatlas.org/ENSG00000176697-BDNF/tissue/colon#img</a>                                      |
|          | Tumor: <a href="https://www.proteinatlas.org/ENSG00000176697-BDNF/pathology/colorectal+cancer#img">https://www.proteinatlas.org/ENSG00000176697-BDNF/pathology/colorectal+cancer#img</a>         |
| GPC1     | Normal: <a href="https://www.proteinatlas.org/ENSG00000063660-GPC1/tissue/colon#img">https://www.proteinatlas.org/ENSG00000063660-GPC1/tissue/colon#img</a>                                      |
|          | Tumor: <a href="https://www.proteinatlas.org/ENSG00000063660-GPC1/pathology/colorectal+cancer#img">https://www.proteinatlas.org/ENSG00000063660-GPC1/pathology/colorectal+cancer#img</a>         |
| NRG1     | Normal: <a href="https://www.proteinatlas.org/ENSG00000157168-NRG1/tissue/colon#img">https://www.proteinatlas.org/ENSG00000157168-NRG1/tissue/colon#img</a>                                      |
|          | Tumor: <a href="https://www.proteinatlas.org/ENSG00000157168-NRG1/pathology/colorectal+cancer#img">https://www.proteinatlas.org/ENSG00000157168-NRG1/pathology/colorectal+cancer#img</a>         |
| SERPINH1 | Normal: <a href="https://www.proteinatlas.org/ENSG00000149257-SERPINH1/tissue/colon#img">https://www.proteinatlas.org/ENSG00000149257-SERPINH1/tissue/colon#img</a>                              |
|          | Tumor: <a href="https://www.proteinatlas.org/ENSG00000149257-SERPINH1/pathology/colorectal+cancer#img">https://www.proteinatlas.org/ENSG00000149257-SERPINH1/pathology/colorectal+cancer#img</a> |
| AGER     | Normal: <a href="https://www.proteinatlas.org/ENSG00000204305-AGER/tissue/colon#img">https://www.proteinatlas.org/ENSG00000204305-AGER/tissue/colon#img</a>                                      |
|          | Tumor: <a href="https://www.proteinatlas.org/ENSG00000204305-AGER/pathology/colorectal+cancer#img">https://www.proteinatlas.org/ENSG00000204305-AGER/pathology/colorectal+cancer#img</a>         |
| ENO2     | Normal: <a href="https://www.proteinatlas.org/ENSG00000111674-ENO2/tissue/colon#img">https://www.proteinatlas.org/ENSG00000111674-ENO2/tissue/colon#img</a>                                      |
|          | Tumor: <a href="https://www.proteinatlas.org/ENSG00000111674-ENO2/pathology/colorectal+cancer#img">https://www.proteinatlas.org/ENSG00000111674-ENO2/pathology/colorectal+cancer#img</a>         |

**Supplementary Table 2. Primer sequences used for RT-qPCR.**

| Gene  | Primer sequence            |
|-------|----------------------------|
| GAPDH | F: ACAACTTTGGTATCGTGGAAGG  |
|       | R: GCCATCACGCCACAGTTTC     |
| ENO2  | F: CCGGGAACCTCAGACCTCATC   |
|       | R: CTCTGCACCTAGTCGCATGG    |
| FGF9  | F: ATGGCTCCCTTAGGTGAAGTT   |
|       | R: CCCAGGTGGTCACTTAACAAAAC |
| GPC1  | F: TGAAGCTGGTCTACTGTGCTC   |
|       | R: CCCAGAACTTGTCGGTGATGA   |
| CD36  | F: CTTTGGCTTAATGAGACTGGGAC |
|       | R: GCAACAAACATCACCACACCA   |
| TIMP1 | F: ACCACCTTATACCAGCGTTATGA |
|       | R: GGTGTAGACGAACCGGATGTC   |
| TERT  | F: TCACGGAGACCACGTTTCAA    |
|       | R: TTCAAGTGCTGTCTGATTCCAAT |

|          |                                                           |
|----------|-----------------------------------------------------------|
| CDKN2A   | F: ATGGAGCCTTCGGCTGACT<br>R: GTAACCTATTCGGTGCGTTGGG       |
| CYP19A1  | F: ACTACAACCGGGTATATGGAGAA<br>R: TCGAGAGCTGTAATGATTGTGC   |
| IL-13    | F: CCTCATGGCGCTTTTGTGAC<br>R: TCTGGTTCTGGGTGATGTTGA       |
| SNAI1    | F: TCGGAAGCCTAACTACAGCGA<br>R: AGATGAGCATTGGCAGCGAG       |
| BDNF     | F: TAACGGCGGCAGACAAAAAGA<br>R: TGCACTTGGTCTCGTAGAAGTAT    |
| PCAT6    | F: CCCCTCCTTACTCTTGGACAAC<br>R: GACCGAATGAGGATGGAGACAC    |
| NRG1     | F: TCCATTAGAATATCAGTATCCACAG<br>R: CATAAGCGACACACAGGATTTC |
| SERPINH1 | F: GCGGGCTAAGAGTAGAATCG<br>R: ATGGCCAGGAAGTGGTTTG         |
| AGER     | F: ACTACCGAGTCCGTGTCTACC<br>R: GGAACACCAGCCGTGAGTT        |

---
